# **Towards comprehensive characterization of CRISPR-linked genes**

Sergey A. Shmakov<sup>1,2</sup>, Kira S. Makarova<sup>2</sup>, Yuri I. Wolf<sup>2</sup>, Konstantin V. Severinov<sup>1,3,4</sup>, Eugene V. Koonin<sup>2,\*</sup>

<sup>1</sup>Skolkovo Institute of Science and Technology, Skolkovo, 143025, Russia; <sup>2</sup>National Center for Biotechnology Information, National Library of Medicine, Bethesda, MD 20894, USA; <sup>3</sup>Waksman Institute for Microbiology Rutgers, The State University of New Jersey Piscataway, NJ 08854, USA; <sup>4</sup>Institute of Molecular Genetics, Russian Academy of Sciences, Moscow, 123182, Russia

\*For correspondence: koonin@ncbi.nlm.nih.gov

## 12 ABSTRACT

13 The CRISPR-Cas systems of bacterial and archaeal adaptive immunity consist of arrays of direct repeats separated by unique spacers  
 14 and multiple CRISPR-associated (*cas*) genes encoding proteins that mediate the adaptation, CRISPR RNA maturation and interference  
 15 stages of the CRISPR response. In addition to the relatively small set of core *cas* genes that are typically present in all representatives  
 16 of each (sub)type of CRISPR-Cas systems and are essential for the defense function, numerous genes occur in CRISPR-*cas* loci only  
 17 sporadically. Some of these have been shown to perform various ancillary roles in CRISPR response whereas the functional relevance  
 18 of many others, if any, remains obscure. We developed a computational strategy for systematically detecting genes that are likely to be  
 19 functionally linked to CRISPR-Cas systems. The approach is based on a “CRISPRicity” metric that measures the strength of CRISPR  
 20 association for all protein-coding genes from sequenced bacterial and archaeal genomes. Uncharacterized genes with CRISPRicity  
 21 values comparable to those of known *cas* genes are considered candidate CRISPR-ancillary genes, and we describe additional criteria  
 22 to identify functionally relevant genes in the candidate set. About 80 genes that were not previously reported to be associated with  
 23 CRISPR-Cas were identified as probable CRISPR-ancillary genes. A substantial majority of these genes reside in type III CRISPR-*cas*  
 24 loci which implies exceptional functional versatility of type III systems. Numerous candidate CRISPR-ancillary genes encode integral  
 25 membrane proteins suggestive of tight membrane connections of type III CRISPR-Cas whereas many other candidates are proteins  
 26 implicated in various signal transduction pathways. These predictions provide ample material for improving annotation of CRISPR-  
 27 *cas* loci and experimental characterization of previously unsuspected aspects of CRISPR-Cas functionality.

28

## SIGNIFICANCE

The CRISPR-Cas systems that mediate adaptive immunity in bacteria and archaea encompass a small set of core *cas* genes that are essential in a broad range of CRISPR-Cas systems. However, a much greater number of genes only sporadically co-occur with CRISPR-Cas, and for most of these, involvement in CRISPR-Cas functions has not been demonstrated. We developed a computational strategy that provides for systematic identification of CRISPR-linked proteins and prediction of their functional association with CRISPR-Cas systems. About 80 previously undetected, putative CRISPR-accessory proteins were identified. A large fraction of these proteins are predicted to be membrane-associated revealing an unknown side of CRISPR biology.

38

## 39 **Introduction**

40 Driven largely by the exceptional recent success of Cas9, Cas12 and Cas13 RNA-guided nucleases as the new generation of genome  
41 and transcriptome editing tools, comparative genomics, structures, biochemical activities and biological functions of CRISPR-Cas  
42 systems and individual Cas proteins have been studied in exquisite detail (1-5). The CRISPR-Cas immune response is conventionally  
43 described in terms of three distinct stages: 1) adaptation, 2) expression and CRISPR (cr) RNA maturation, and 3) interference. At the  
44 adaptation stage, a distinct complex of Cas proteins binds to a target DNA, migrates along that molecule and, typically after  
45 encountering a short (2 to 4 bp) motif known as PAM (Protospacer-Adjacent Motif), excises a portion of the target DNA  
46 (protospacer), and inserts it into the CRISPR array between two repeats (most often, at the beginning of the array, downstream of the  
47 leader sequence) as a spacer (6, 7). The adaptation process creates immune memory, i.e. “vaccinates” a bacterium or archaeon against  
48 subsequent infection with the memorized agent. At the expression-maturation stage, the CRISPR array is transcribed into a single,  
49 long transcript, the pre-cr(CRISPR)RNA, that is then processed into mature crRNAs, each consisting of a spacer and a portion of an  
50 adjacent repeat, by a distinct complex of Cas proteins or a single, large Cas protein, or an external, non-Cas RNase (8). At the final,  
51 interference stage, the crRNA that typically remains bound to the processing complex is employed as the guide to recognize the  
52 protospacer or a closely similar sequence in an invading genome of a virus or plasmid that is then cleaved and inactivated by a Cas  
53 nuclease (s) (9, 10).

54 Under the current classification, the CRISPR-Cas systems are divided into two classes which radically differ with respect to the  
55 composition and structure of the effector modules that are responsible for the interference and, in most of the CRISPR-Cas types, also  
56 the processing stages (11, 12). In Class 1 systems, which include types I, III and IV, the effector module is a complex of several Cas  
57 proteins which perform a tightly coordinated sequence of reaction, from pre-crRNA processing to target cleavage. In Class 2 systems,

58 including types II, V and VI, all activities of the effector module reside in a single, large multidomain protein such as Cas9 in type II,  
59 the programmable endonuclease that is most widely used for genome editing applications (2, 3, 13).

60

61 The biochemical activities and biological functions of the 13 families of core Cas proteins that are essential for each of the three stages  
62 of the CRISPR immune response in different types of CRISPR-Cas have been extensively studied although some notable gaps in  
63 knowledge remains (4, 14, 15). Thus, Cas1 and Cas2 form the adaptation complex that is universal to all autonomous CRISPR-Cas  
64 systems (many type III loci and a few in other types lack the adaptation module and apparently rely on the adaptation machinery of  
65 other CRISPR-Cas systems in the same organism which they recruit in trans). Cas3 is a helicase that typically also contains a nuclease  
66 domain and is involved in target cleavage in type I systems. Cas4 is an endonuclease that is required for adaptation in many CRISPR-  
67 Cas variants although its exact function remains unknown. Cas5, Cas6, and Cas7 are distantly related members of the so-called RAMP  
68 domain superfamily which includes RNases involved in pre-crRNA processing in types I and III (Cas6 and some variants of Cas5), as  
69 well as enzymatically inactive RNA-binding proteins that form the backbone of type I and type III effector complexes. Cas8 is the  
70 enzymatically inactive large subunit of type I effector complexes. Cas9 is the type II effector nuclease. Cas10 is the large subunit of  
71 the type III effector complexes that contains a Palm domain homologous to those of DNA polymerases and nucleotide cyclases and  
72 possesses a oligoA synthetase activity. Cas11 is the small subunit of the type I and type III effector complexes. Cas12 is the effector  
73 endonuclease of type V. Finally, Cas13 is the effector RNase of type VI.

74 In addition to the core proteins included in the formal Cas nomenclature, numerous proteins are found in various subsets of CRISPR-  
75 Cas systems and are generally thought of as performing accessory, in particular, regulatory functions in the CRISPR response (4, 11,  
76 16). Admittedly, the separation of the proteins encoded in the CRISPR loci into Cas and accessory groups is somewhat arbitrary  
77 because some of the “accessory” ones play important roles in the functionality of the system. As a case in point, many type III systems  
78 employ an alternative mechanism of adaptation, namely, spacer acquisition from RNA via reverse transcription by a reverse

transcriptase (RT) that is encoded in the CRISPR-*cas* locus, often being fused to the Cas1 protein (17, 18). Another striking case of an “accessory” protein turning out to be an essential component of CRISPR-Cas systems is the recently elucidated function of the Csm6 protein that is also common among type III systems and consists of a nucleotide ligand-binding CARF domain fused to a HEPN RNase domain (19). It has been shown in two independent studies that upon target recognition by Csm6-containing type III systems, Cas10 is induced to synthesize oligoA molecules that are bound by the CARF domain of Csm6 resulting in stimulation of the RNase activity of the HEPN domain which then initiates the immune response (20, 21). However, for most of the putative accessory proteins encoded in CRISPR-*cas* loci, the functions and the very relevance for the CRISPR response remain unknown. The question of functional relevance is far from being moot because defense islands in microbial genomes appear to be “genomic junkyards” that often accommodate functionally irrelevant genes (22).

We sought to develop a computational strategy for systematic identification of proteins that are non-randomly associated with CRISPR-Cas systems and assess their functional relevance. The approach is based on the CRISPRicity metric that measures the strength of CRISPR association for individual genes. Genes with CRISPRicity values similar to those of *cas* genes were considered candidates for previously undetected accessory genes, and the encoded proteins were examined in depth using sensitive methods for domain identification and coevolution analysis. More than 100 genes encoding diverse proteins were predicted to be involved in CRISPR-Cas functions although not connected to CRISPR-Cas previously. A substantial majority of the detected putative CRISPR-accessory proteins are encoded in type III CRISPR-*cas* loci, and many of these are implicated in membrane association of these systems and/or various signaling pathways.

## RESULTS AND DISCUSSION

99 **CRISPR-linked genes predicted using CRISPRicity.** In bacteria and archaea, functionally linked genes are often organized into  
100 operons, i.e. arrays of co-directed, co-transcribed and co-translated genes (23-25). The evolutionary dynamics of operons is such that,  
101 for a group of genes that are involved in the same pathway or functional system, different microbial genomes often contain partially  
102 overlapping operons encoding subsets of proteins involved in the respective process (26). Comparative analysis of gene  
103 neighborhoods in multiple genomes often provides for a complete delineation of the components of functional systems. Indeed,  
104 precisely this type of analysis resulted in the description of the group of functionally linked proteins that later became known as Cas  
105 (27).

106 We sought to expand the set of proteins that are functionally linked to the CRISPR-mediated immunity by enumerating all genes in  
107 the CRISPR neighborhoods and attempting to distinguish functionally relevant genes from spurious ones. To this end, a dedicated  
108 computational pipeline was constructed (Figure 1). Briefly, we identified the union of all genes located in the vicinity ( $\pm 10$  kb) of  
109 CRISPR arrays, *casI* genes (representing the CRISPR-Cas adaptation module) or CRISPR effector modules (for details, see Methods  
110 and Supporting Information File 1), hereinafter, CRISPR-linked genes. The union of all these genes was taken so as to maximize the  
111 likelihood of detection of CRISPR-linked genes because certain CRISPR-*cas* loci might lack one or even two these key elements. All  
112 genes in the CRISPR-cas neighborhoods were represented as points in 3 dimensions defined by: 1) CRISPRicity, i.e. the ratio of the  
113 number of CRISPR-linked occurrences of the given gene to its total number of occurrences in the analyzed genomes, 2) abundance  
114 (total number of occurrences), and 3) distance from the respective genomic anchor (CRISPR array, *casI* or effector). All the genes in  
115 the neighborhoods were classified into 1) CRISPR-associated (including both *cas* genes and previously identified accessory genes), 2)  
116 non-CRISPR (i.e. genes with well-characterized functions unrelated to the CRISPR immunity), and 3) unknowns. The counts of the  
117 genes in each of the 3 classes were obtained for each voxel in the space of the 3 coordinates defined above, and the ratio of the  
118 probability mass of CRISPR-associated genes ( $D_c$ ) to that of the non-CRISPR genes ( $D_n$ ) was calculated (hereinafter CRISPR-index;  
119 see Methods for details). The “unknown” and “non-CRISPR” genes with  $D_c/D_n > 2$  were considered candidates for previously  
120 undetected CRISPR-linked genes. This threshold was chosen to select genes with similar characteristics to genes known to be

121 functionally linked to CRISPR-Cas system. Indeed, the range of CRISPR-index values for the candidate accessory proteins identified  
122 by this procedure overlapped that for Cas proteins and functionally characterized accessory proteins which is compatible with their  
123 functional relevance of the previously undetected candidates (Figure 2A). Clearly, the CRISPR-index cut-off can be adjusted to search  
124 for stricter or looser associations.

125 Altogether, the above procedure yielded 468 putative distinct candidate CRISPR-linked genes (i.e. clusters of related sequences)  
126 (Figure 2A,B and Supporting Table S1). The 360 (predicted) clusters that included homologous proteins with sequences longer than  
127 100 amino acids were thoroughly explored case by case using methods for sequence profile comparison and phylogenetic analysis (see  
128 Methods for details). From this initial list of candidates, 69 proteins were found to be previously unannotated and diverged variants of  
129 known Cas and accessory proteins; 79 were classified as likely previously undetected CRISPR-linked proteins; and the remaining 212  
130 ones were inferred to be, most likely, irrelevant for the CRISPR function based on the genomic context analysis (are poorly conserved  
131 genes represented only in closely related genomes, common components of defense islands that only co-occur with *cas* genes, gene  
132 fragments, and open reading frames overlapping with CRISPR arrays; see Table S1). Previously missed members of Cas protein  
133 families known for their fast evolution, in particular, both the large and the small subunits of type I effector complexes and the type III  
134 small subunit, were identified in CRISPR-*cas* loci of most subtypes of both types (Figure 2B and Table S1 in the SI). Additionally,  
135 detection of previously unidentified Cas proteins was common for type IV systems that are typically carried by plasmids and appear to  
136 be the most diverged among the known CRISPR-Cas systems (Figure 2B and Table S1 in the SI). Strikingly, the distribution of the  
137 predicted accessory proteins among CRISPR-Cas variants was far more skewed than the distribution of previously undetected Cas  
138 proteins: the great majority of candidate accessory genes were detected in type III loci (Figure 2B and Table S1). When this  
139 manuscript was in the final stage of preparation, a preprint has been released describing the identification of 39 protein families  
140 associated with type III CRISPR-Cas systems (28); this list partially overlaps with list of CRISPR-linked genes detected in the present  
141 work. To assist future annotation of CRISPR-Cas loci we constructed new sequence alignments (profiles) for accessory proteins using  
142 the sequences detected in this study (Supporting Information Files 2 and 3).



143 ***Predicted CRISPR-linked proteins: membrane connections and signal transduction.*** The set of predicted CRISPR-accessory  
 144 proteins included those that have been shown to stably co-occur or even function jointly with specific CRISPR-Cas variants but have  
 145 not been formally listed as CRISPR-linked. These included reverse transcriptase (RT) (17, 18), Argonaute family proteins (29, 30) and  
 146 transposon-encoded proteins of the TniQ family (31). However, the majority of the predicted CRISPR-linked proteins have not been  
 147 described previously. Below we discuss several examples of previously undetected CRISPR-linked genes that are representative of the  
 148 findings made through the CRISPRicity analysis.

149 A major theme that is emerging from the case by case examination of the predicted CRISPR accessory genes is the potential  
 150 membrane connection of CRISPR-Cas systems, especially, those of type III (Table S1). The most abundant of these genes is *corA*  
 151 which encodes a widespread divalent cation channel in bacteria and archaea where it provides the primary route for electrophoretic  
 152  $Mg^{2+}$  uptake (32) (Figure 3A). A subset of CorA proteins are encoded in numerous subtype III-B CRISPR-*cas* loci. These loci show  
 153 considerable diversity of genome architectures, and in many of them, the *corA* gene is adjacent to a gene coding for a DHH family  
 154 nuclease (33) or even fused to it (eg. EDN71418.1 from *Beggiatoa sp.* PS). Moreover, some of these loci also contain a gene for  
 155 another predicted nuclease (RNase), one of the NYN family (34) (Figure 3A). Structural analysis of CorA has shown that the protein  
 156 is a pentamer, with each subunit contributing two transmembrane (TM) helices and containing a bulky cytosolic part (35, 36). The  
 157 stable association of CorA with type III-B CRISPR-Cas strongly suggests a functional connection, and more specifically, a link  
 158 between the CRISPR-mediated defense and membrane processes. Moreover, in a previous analysis, we have serendipitously detected  
 159 evidence of recombination within III-B loci of *Clostridium botulinum* where *corA* segregated with the effector genes, suggestive of  
 160 coordinated functions (37). However, predicting the CRISPR-linked functions of CorA more precisely is difficult. The nuclease  
 161 connection suggests that CorA might regulate additional cleavage of the target and/or its transcripts DNA during the CRISPR response  
 162 but more generally, it seems likely that CorA was exapted for membrane tethering of the respective CRISPR-Cas systems.

163 Numerous type III systems of subtypes A, B and D encompass genes that encode previously undetected, highly diverged proteins  
 164 containing a CARF domain (38) and two predicted transmembrane helices; additionally, some of these proteins contain a fused,  
 165 diverged Lon family (39) protease domain (Figure 3B). Membrane topology prediction suggests that the CARF domain faces the  
 166 cytosol whereas the Lon protease is extracellular (Figure 3B). Given that the respective CRISPR-*cas* loci do not encode any other  
 167 CARF domains but possess Cas10 proteins with predicted nucleotide polymerization activity, it appears most likely that the  
 168 membrane-bound CARFs recognize signaling oligoA molecules synthesized by Cas10. However, the nature of the effector that could  
 169 be activated by such binding remains unclear. The Lon family protease might fulfill this function in the case of the respective fusion  
 170 proteins but we cannot currently predict the specific mechanism. In other cases, predicted membrane proteins are stably associated  
 171 with type III CRISPR-Cas but contain no identifiable soluble domains that would provide for a specific functional prediction;  
 172 nevertheless, it appears likely that such proteins anchor the CRISPR-Cas machinery in the bacterial membrane (Figure 3C).

173 A distinct variant of apparently degenerate I-E systems that lack Cas1, Cas2 and Cas3, and accordingly, cannot be active in either  
 174 adaptation or target cleavage encode a predicted NTPase of the STAND superfamily (40) that, in addition to the P-loop NTPase  
 175 domain, contains a cassette of TPR repeats (Figure 4A). The STAND NTPases that typically contain protein-protein interaction  
 176 domains, such as TPR, are involved in various signal transduction networks that are poorly characterized in prokaryotes, but in  
 177 eukaryotes, are involved in programmed cell death (40, 41). Phylogenetic analysis of STAND NTPases shows that the CRISPR-  
 178 associated ones form a strongly supported branch (Figure 4A, Supporting Information File 4). Given the considerable diversity of gene  
 179 arrangements in these loci, the monophyly of the NTPases implies their long-term association with CRISPR-Cas systems. Notably, in  
 180 many cases, the gene adjacent to the NTPase gene encodes a predicted small membrane protein (Figure 4A) suggesting, once again,  
 181 membrane association of CRISPR-Cas. This particular variant of subtype I-E is likely to perform a non-defense, probably, regulatory  
 182 function and, through the STAND NTPase, might connect to signaling pathways that remain to be identified.

183 Many subtype IV-B loci that are typically located on plasmids or predicted prophages (Figure 4B) encode a predicted enzyme of the  
 184 CysH family which belongs to the adenosine 5'-phosphosulfate (PAPS) reductase family (42). Some of these loci also encode a  
 185 predicted enzyme of the ADP-ribosyltransferase family (43) (Figure 4B). Similarly to the subtype I-E systems discussed above as well  
 186 as “minimal” I-F systems encoded by Tn7-like transposons (31), type IV systems lack nucleases that could cleave the target DNA, and  
 187 therefore, can be predicted to perform non-defense functions similarly to transposon-encoded CRISPR-Cas systems (31). Analogously  
 188 to the case of the STAND NTPases, the CRISPR-associated CysH homologs comprise a well-supported clade in the phylogenetic tree  
 189 of the CysH protein family (Figure 4B, Supporting Information File 5). As with other predicted CRISPR accessory genes, the CysH-  
 190 like enzyme and the associated proteins might play a role in a signal transduction pathway connecting CRISPR-Cas with cellular  
 191 regulatory networks and perhaps stabilizing the prophages and plasmids in the host bacteria.

192 ***Coevolution of predicted CRISPR-linked genes with bona fide cas genes.*** The predicted CRISPR-linked genes recur in multiple  
 193 CRISPR-*cas* loci and accordingly can be predicted to contribute to the functions of the respective CRISPR-Cas systems. We sought to  
 194 explore the linkage between these genes and CRISPR-Cas at a deeper level. To this end, we performed an analysis of potential  
 195 coevolution between those of the predicted accessory genes that are sufficiently widespread and well-conserved with signature *cas*  
 196 genes. Phylogenetic trees were constructed for the analyzed CRISPR-linked genes and compared to trees of *cas* genes and, as a  
 197 control, to those for 16S RNA (a proxy for the species tree of the respective microbes), and the evolutionary distances between the  
 198 respective genes from different organisms extracted from the trees were compared (see Methods for details). Notably, the evolutionary  
 199 distances for the *corA* genes were strongly, positively correlated with the distances for *cas10* whereas none of these genes showed  
 200 comparative correlation with 16S RNA (Figure 5A-C, Supporting Information Files 6-10) suggesting that the genes within the  
 201 CRISPR-*cas* loci including *corA* coevolve but the loci themselves spread largely via horizontal transfer. In the case of the membrane-  
 202 associated CARF-domain proteins, highly significant correlation was observed between the trees for these proteins and both Cas10  
 203 and 16S RNA (Figure 5 D-F) suggesting that the evolution of the respective subset of type III CRISPR-Cas systems, including the  
 204 accessory proteins predicted here, involved a major vertical component. In contrast, in the case of RT associated with type III systems,

the correlations between the RT trees and those for both cas10 and 16 S RNA were relatively weak (Figure 5 G-I), in agreement with the previous conclusion that the RT-containing adaptation modules largely behaved as distinct evolutionary units (17). Thus, comparative analysis of phylogenetic trees highlights distinct patterns of evolution among CRISPR-Cas systems but on the whole, presents strong evidence of coevolution and implies tight functional association between (at least) the most common of the predicted CRISPR accessory genes and the effector modules of the respective systems.

## CONCLUSIONS

We developed a computational strategy to predict genes that are functionally linked to CRISPR-Cas systems. Exhaustive case by case analysis of the detected CRISPR-linked genes shows that, despite the absence of rigorous statistical framework, this “CRISPRicity” strategy yields sets of genes that are highly enriched in confident predictions of functional association. Clearly, this approach can be readily generalized beyond CRISPR-Cas, to systematically explore functional links for any other systems encoded in microbial genomes. In biological terms, the CRISPRicity analysis reveals remarkable functional complexity of type III CRISPR-Cas systems that seems to substantially exceed that other CRISPR-Cas types. Major themes among the previously unnoticed CRISPR-linked genes identified here are the predicted membrane association and connections to signal transduction pathways. These findings imply that entire layers of CRISPR-Cas biology remain unexplored and open up many experimental directions.

221

## 222 MATERIALS AND METHODS

223 ***Prokaryotic Genome Database.*** Prokaryotic database that consisted of 4,961 completely assembled genomes and 43,599 partial  
224 genomes, or 6,342,452 nucleotide sequences altogether (genome partitions, such as chromosomes and plasmids, and contigs), was  
225 assembled from archaeal and bacterial genomic sequences downloaded from the NCBI FTP database  
226 (<ftp://ftp.ncbi.nlm.nih.gov/genomes/all/>) in March 2016. Default open reading frame (ORF) annotation available on the FTP site was  
227 used for well annotated genomes (coding density > 0.6 coding sequences per kilobase), and the rest of the genomes were annotated  
228 with Meta-GeneMark (44) using the standard model MetaGeneMark\_v1.mod (Heuristic model for genetic code 11 and GC 30).

229

230 ***CRISPR array detection and annotation.*** The CRISPR arrays were identified as previously described (45). Briefly, the Prokaryotic  
231 Genome Database was scanned with CRISPRFinder (46) and PILER-CR (47) using default parameters. The search identified 61,581  
232 and 49,817 CRISPR arrays respectively. The union of the search results with the two methods were taken as the set of 65,194  
233 predicted CRISPR arrays; the CRISPRFinder prediction was accepted in cases of overlap. To eliminate spurious CRISPR array  
234 predictions, arrays of unknown type that did not produce reliable BLASTN hits (90% identity and 90% coverage) into CRISPR arrays  
235 of known type were discarded. This filtering resulted in 42,352 CRISPR arrays that were taken as the final prediction for the  
236 subsequent analyses.

237

238 ***Detection and annotation of CRISPR-Cas proteins.*** The translated prokaryotic database was searched with PSI-BLAST (48) using  
239 the previously described CRISPR-Cas protein profiles (11, 49, 50) with an e-value cutoff of  $10^{-4}$  and effective database size set to  
240  $2 \times 10^7$ .

241

242 **Bait islands.** For the purpose of identification of previously undetected CRISPR-linked genes, three groups of “baits” were selected:

243 1) All CRISPR arrays from the final set of predictions

244 2) Effector modules, i.e. all interference-related genes detected using Cas protein profiles

245 3) Adaptation modules, i.e. *casI* genes located within 10 kb of a *cas2* and/or *cas4* gene (this additional criterion was adopted  
246 because of the existence of non-CRISPR-associated *casI* homologs).

247 Bait islands, a data structure describing genomic neighborhoods of the above 3 classes of baits, were constructed by annotating all  
248 ORFs within 10 kb upstream and downstream of the baits. The ORFs were annotated using 30,953 COG, pfam, and cd protein profiles  
249 from the NCBI CDD database (51) and 217 custom CRISPR-Cas profiles (49) using PSI-BLAST profile search with the same  
250 parameters as above.

251

252 **Construction of protein clusters.** Clusters of homologous proteins were constructed for all ORFs detected in the bait islands using the  
253 following iterative procedure:

254 1. all proteins were clustered using UCLUST (52) with the sequence similarity threshold of 0.3 forming permissive cluster set;

255 2. for each permissive cluster with 3 or more proteins, its members were clustered using UCLUST with sequence similarity  
256 threshold of 0.9, forming strict clusters inside the permissive cluster. The number of strict clusters within a permissive cluster  
257 was taken to represent the effective number of sequences in the given permissive cluster;

- 258 3. for each permissive cluster, representatives of all constituent strict clusters were aligned using MAFFT (53). The resulting  
259 alignments were used as queries to initiate a PSI-BLAST search against all sequences within the permissive cluster. Sequences  
260 that did not produce a significant hit (e-value cutoff of  $10^{-4}$ ) were removed. This step was repeated until convergence;
- 261 4. three iterations of steps 2 and 3 were repeated with the updated set of the permissive clusters;
- 262 5. the final clustering step using UCLUST with sequence similarity threshold of 0.5 was performed with all remaining singleton  
263 sequences;

264 The 16,433 clusters with effective size of 3 and greater that were constructed using this procedure were used for further analysis.

265

266 ***Measures of CRISPR-Cas association.*** Alignments of the permissive clusters was used to initiate a PSI-BLAST search against the  
267 prokaryotic sequence database with an e-value cutoff of  $10^{-4}$  and effective database size set to  $2 \times 10^7$ . All hits covering less than 40%  
268 of the query profile were discarded. When multiple queries produced overlapping hits (using the overlap threshold of 25%) to the  
269 same target sequence, the corresponding target segment was assigned to the highest-scoring query.

270 All target segments assigned to the same query were, once again, clustered using UCLUST with the sequence similarity threshold of  
271 0.3. Clusters that did not contain any sequence from the query profiles were removed.

272 For the sets of hits assigned to a particular query profile, the effective number of sequences was calculated as described above for:

- 273 1. all sequences retrieved from the Prokaryotic Genome Database retrieved by the given profile;
- 274 2. sequences from all bait islands
- 275 3. sequences from the CRISPR array islands

276 4. sequences from the effector module islands

277 5. sequences from the adaptation module islands

278 The aggregate measure of CRISPR association (CRISPRicity) was calculated for each permissive cluster as the ratio of the effective  
279 number of sequences in the bait islands to the effective number of sequences in the entire database that were associated with the given  
280 cluster.

281 Each gene in a specific bait island can be characterized by its genomic distance from the respective bait, i.e. the number of gene  
282 between the given gene and the bait (genes directly adjacent to the bait and the baits themselves were assigned the distance of 0). The  
283 median of the distance to the closest bait across all representatives was used to characterize the permissive cluster.

284

285 ***Selection of candidate CRISPR-linked protein clusters.*** The CRISPRicity-abundance-distance space, embedding all permissive  
286 clusters, was partitioned into 1,000 voxels (volume elements) as follows. The CRISPRicity range (from 0 to 1) was split into 10 equal  
287 intervals. The abundance (the effective number of sequences in bait islands) range was split into 10 intervals in log space with a step  
288 of 0.3 decimal log units (factor of ~2.0), starting from 1; all clusters with abundance of  $502 = 10^{0.3 \times 9}$  or greater were assigned to the  
289 last interval. The distance range was split into 10 intervals with a step of 1, starting from the distance of 0 (adjacent to the bait);  
290 clusters with distances of 9 and above were assigned to the last interval. This 10x10x10 grid formed the 1,000 voxels. Within each  
291 voxel, the known Cas (together with Cas-associated) clusters and non-Cas clusters were counted; their probability masses ( $D_c$  and  $D_n$   
292 respectively) were calculated as the counts divided by the total number of such genes. Voxels with the CRISPR-index (ratios of  
293 densities)  $I = D_c/D_n > 2$  were selected for further analysis.

294



295 ***Phylogenetic analysis.*** The 16S rRNA tree was constructed for all organisms from the prokaryotic database where both 16S SSU  
 296 rRNA and CRISPR-Cas Type III system were found. The 16S rRNA genes were identified using BLASTN (48) search with the  
 297 *Pyrococcus* sp. NA2 16S rRNA as the query for archaeal genomes and the *Escherichia coli* K-12 ER3413 16S rRNA as a query for  
 298 bacterial genomes (word size of 8 and dust filtering off). The best scoring BLASTN hits with at least 80% coverage and 70% identity  
 299 were taken for each organism, 16S rRNA sequences were aligned using MAFFT (53), and a phylogenetic tree was constructed using  
 300 FastTree (54) with gamma-distributed site rates and GTR evolutionary model. Protein sequences were iteratively aligned using  
 301 hhalgn (55) starting from MUSCLE (56) alignments of UCLUST clusters (similarity cutoff of 0.5). Approximate ML trees were built  
 302 from these alignments using FastTree with gamma-distributed site rates and WAG evolutionary model.

303

304 ***Case by case analysis and annotation of permissive clusters of putative CRISPR-linked proteins.*** PSI-BLAST searches with COG,  
 305 pfam, and cd protein profiles from NCBI CDD database (51) and with the custom CRISPR-Cas profiles (49) were run against a  
 306 database made from consensus sequences (57) of the permissive clusters with an e-value cutoff of  $10^{-4}$  and effective database size set  
 307 to  $2 \times 10^7$ .

308 Iterative profile searches using PSI-BLAST (48), with a cut-off e-value of 0.01, and composition based-statistics and low complexity  
 309 filtering turned off, were used to search for distantly similar sequences in NCBI's non-redundant (NR) database. Another sensitive  
 310 method for remote sequence similarity detection, HHpred, was used with default parameters (55). Additionally, clusters were  
 311 annotated using HHSearch (55) comparison between cluster-derived HMM profiles and CDD-derived HMM profiles. The results with  
 312 an HHSearch probability score greater than 80% were recorded.

313 Protein secondary structure was predicted using Jpred (58). Transmembrane segments were predicted using the TMMHMM v. 2.0c  
 314 program with default parameters (59).

315 A fraction of the permissive protein clusters was found to comprise CRISPR arrays falsely annotated as protein-coding sequences.  
 316 Clusters containing more than 10% of sequences overlapping with known CRISPR arrays or matching CRISPR repeats with 90%  
 317 identity and 90% coverage in BLASTN search were identified and discarded from further analysis.

318

## 319 **Acknowledgements**

320 We thank Koonin group members for useful discussions.

321

322

- 323 1. Sorek R, Lawrence CM, & Wiedenheft B (2013) CRISPR-mediated adaptive immune systems in bacteria and archaea. *Annu Rev Biochem*  
 324 82:237-266
- 325 2. Wright AV, Nunez JK, & Doudna JA (2016) Biology and Applications of CRISPR Systems: Harnessing Nature's Toolbox for Genome  
 326 Engineering. *Cell* 164(1-2):29-44
- 327 3. Komor AC, Badran AH, & Liu DR (2016) CRISPR-Based Technologies for the Manipulation of Eukaryotic Genomes. *Cell*  
 328 <http://dx.doi.org/10.1016/j.cell.2016.10.044>
- 329 4. Mohanraju P, *et al.* (2016) Diverse evolutionary roots and mechanistic variations of the CRISPR-Cas systems. *Science* 353(6299):aad5147
- 330 5. Barrangou R & Horvath P (2017) A decade of discovery: CRISPR functions and applications. *Nat Microbiol* 2:17092
- 331 6. Amitai G & Sorek R (2016) CRISPR-Cas adaptation: insights into the mechanism of action. *Nat Rev Microbiol* 14(2):67-76
- 332 7. Sternberg SH, Richter H, Charpentier E, & Qimron U (2016) Adaptation in CRISPR-Cas Systems. *Mol Cell* 61(6):797-808
- 333 8. Charpentier E, Richter H, van der Oost J, & White MF (2015) Biogenesis pathways of RNA guides in archaeal and bacterial CRISPR-Cas  
 334 adaptive immunity. *FEMS Microbiol Rev* 39(3):428-441
- 335 9. Plagens A, Richter H, Charpentier E, & Randau L (2015) DNA and RNA interference mechanisms by CRISPR-Cas surveillance complexes.  
 336 *FEMS Microbiol Rev* 39(3):442-463
- 337 10. Nishimasu H & Nureki O (2017) Structures and mechanisms of CRISPR RNA-guided effector nucleases. *Curr Opin Struct Biol* 43:68-78
- 338 11. Makarova KS, *et al.* (2015) An updated evolutionary classification of CRISPR-Cas systems. *Nat Rev Microbiol* 13(11):722-736
- 339 12. Koonin EV, Makarova KS, & Zhang F (2017) Diversity, classification and evolution of CRISPR-Cas systems. *Curr Opin Microbiol* 37:67-78

- 340 13. Doudna JA & Charpentier E (2014) Genome editing. The new frontier of genome engineering with CRISPR-Cas9. *Science*
- 341 346(6213):1258096
- 342 14. van der Oost J, Westra ER, Jackson RN, & Wiedenheft B (2014) Unravelling the structural and mechanistic basis of CRISPR-Cas systems.
- 343 *Nat Rev Microbiol* 12(7):479-492
- 344 15. Jiang F & Doudna JA (2015) The structural biology of CRISPR-Cas systems. *Curr Opin Struct Biol* 30:100-111
- 345 16. Makarova KS, Wolf YI, & Koonin EV (2013) The basic building blocks and evolution of CRISPR-cas systems. *Biochem Soc Trans* 41(6):1392-
- 346 1400
- 347 17. Silas S, *et al.* (2017) On the Origin of Reverse Transcriptase-Using CRISPR-Cas Systems and Their Hyperdiverse, Enigmatic Spacer
- 348 Repertoires. *MBio* 8(4)
- 349 18. Silas S, *et al.* (2016) Direct CRISPR spacer acquisition from RNA by a natural reverse transcriptase-Cas1 fusion protein. *Science*
- 350 351(6276):aad4234
- 351 19. Anantharaman V, Makarova KS, Burroughs AM, Koonin EV, & Aravind L (2013) Comprehensive analysis of the HEPN superfamily:
- 352 identification of novel roles in intra-genomic conflicts, defense, pathogenesis and RNA processing. *Biol Direct* 8:15
- 353 20. Kazlauskienė M, Kostiuik G, Venclovas C, Tamulaitis G, & Siksnys V (2017) A cyclic oligonucleotide signaling pathway in type III CRISPR-Cas
- 354 systems. *Science* 357(6351):605-609
- 355 21. Niewoehner O, *et al.* (2017) Type III CRISPR-Cas systems produce cyclic oligoadenylate second messengers. *Nature*
- 356 22. Makarova KS, Wolf YI, Snir S, & Koonin EV (2011) Defense islands in bacterial and archaeal genomes and prediction of novel defense
- 357 systems. *J Bacteriol* 193(21):6039-6056
- 358 23. Jacob F & Monod J (1961) Genetic regulatory mechanisms in the synthesis of proteins. *J. Mol. Biol.* 3:318-356
- 359 24. Wolf YI, Rogozin IB, Kondrashov AS, & Koonin EV (2001) Genome alignment, evolution of prokaryotic genome organization and
- 360 prediction of gene function using genomic context. *Genome Res.* 11:356-372
- 361 25. Beckwith J (2011) The operon as paradigm: normal science and the beginning of biological complexity. *J Mol Biol* 409(1):7-13
- 362 26. Rogozin IB, *et al.* (2002) Connected gene neighborhoods in prokaryotic genomes. *Nucleic Acids Res* 30(10):2212-2223
- 363 27. Makarova KS, Aravind L, Grishin NV, Rogozin IB, & Koonin EV (2002) A DNA repair system specific for thermophilic Archaea and bacteria
- 364 predicted by genomic context analysis. *Nucleic Acids Res* 30(2):482-496
- 365 28. Shah SAA, O. S., Behler, J., Han, W., She, Q., Hess, W. R., Garrett, R. A., Backofen, R. (2018) Conserved accessory proteins encoded with
- 366 archaeal and bacterial Type III CRISPR-Cas gene cassettes that may specifically modulate, complement or extend interference activity.
- 367 <https://www.biorxiv.org/content/early/2018/02/09/262675>
- 368 29. Swarts DC, *et al.* (2014) The evolutionary journey of Argonaute proteins. *Nat Struct Mol Biol* 21(9):743-753
- 369 30. Kaya E, *et al.* (2016) A bacterial Argonaute with noncanonical guide RNA specificity. *Proc Natl Acad Sci U S A* 113(15):4057-4062
- 370 31. Peters JE, Makarova KS, Shmakov S, & Koonin EV (2017) Recruitment of CRISPR-Cas systems by Tn7-like transposons *Proc Natl Acad Sci U*
- 371 *S A* pii: 201709035. doi: 10.1073/pnas.1709035114
- 372 32. Maguire ME (2006) The structure of CorA: a Mg(2+)-selective channel. *Curr Opin Struct Biol* 16(4):432-438

- 373 33. Aravind L & Koonin EV (1998) A novel family of predicted phosphoesterases includes Drosophila prune protein and bacterial RecJ  
374 exonuclease. *Trends Biochem Sci* 23(1):17-19
- 375 34. Anantharaman V & Aravind L (2006) The NYN domains: novel predicted RNases with a PIN domain-like fold. *RNA Biol* 3(1):18-27
- 376 35. Matthies D, *et al.* (2016) Cryo-EM Structures of the Magnesium Channel CorA Reveal Symmetry Break upon Gating. *Cell* 164(4):747-756
- 377 36. Lerche M, Sandhu H, Flockner L, Högbo M, & Rapp M (2017) Structure and Cooperativity of the Cytosolic Domain of the CorA Mg(2+)  
378 Channel from Escherichia coli. *Structure* 25(8):1175-1186 e1174
- 379 37. Puigbo P, Makarova KS, Kristensen DM, Wolf YI, & Koonin EV (2017) Reconstruction of the evolution of microbial defense systems. *BMC*  
380 *Evol Biol* 17(1):94
- 381 38. Makarova KS, Anantharaman V, Grishin NV, Koonin EV, & Aravind L (2014) CARF and WYL domains: ligand-binding regulators of  
382 prokaryotic defense systems. *Front Genet* 5:102
- 383 39. Smith CK, Baker TA, & Sauer RT (1999) Lon and Clp family proteases and chaperones share homologous substrate-recognition domains.  
384 *Proc Natl Acad Sci U S A* 96(12):6678-6682
- 385 40. Leipe DD, Koonin EV, & Aravind L (2004) STAND, a class of P-loop NTPases including animal and plant regulators of programmed cell  
386 death: multiple, complex domain architectures, unusual phyletic patterns, and evolution by horizontal gene transfer. *J Mol Biol* 343(1):1-  
387 28
- 388 41. Koonin EV & Aravind L (2002) Origin and evolution of eukaryotic apoptosis: the bacterial connection. *Cell Death Differ* 9(4):394-404
- 389 42. Bick JA, Dennis JJ, Zylstra GJ, Nowack J, & Leustek T (2000) Identification of a new class of 5'-adenylylsulfate (APS) reductases from  
390 sulfate-assimilating bacteria. *J Bacteriol* 182(1):135-142
- 391 43. Jeong BR, *et al.* (2011) Structure function analysis of an ADP-ribosyltransferase type III effector and its RNA-binding target in plant  
392 immunity. *J Biol Chem* 286(50):43272-43281
- 393 44. Besemer J, Lomsadze A, & Borodovsky M (2001) GeneMarkS: a self-training method for prediction of gene starts in microbial genomes.  
394 Implications for finding sequence motifs in regulatory regions. *Nucleic Acids Res* 29(12):2607-2618
- 395 45. Shmakov SA, *et al.* (2017) The CRISPR Spacer Space Is Dominated by Sequences from Species-Specific Mobilomes. *MBio* 8(5)
- 396 46. Grissa I, Vergnaud G, & Pourcel C (2007) CRISPRFinder: a web tool to identify clustered regularly interspaced short palindromic repeats.  
397 *Nucleic Acids Res* 35(Web Server issue):W52-57
- 398 47. Edgar RC (2007) PILER-CR: fast and accurate identification of CRISPR repeats. *BMC Bioinformatics* 8:18
- 399 48. Altschul SF, *et al.* (1997) Gapped BLAST and PSI-BLAST: a new generation of protein database search programs. *Nucleic Acids Res*  
400 25(17):3389-3402
- 401 49. Makarova KS & Koonin EV (2015) Annotation and Classification of CRISPR-Cas Systems. *Methods Mol Biol* 1311:47-75
- 402 50. Shmakov S, *et al.* (2017) Diversity and evolution of class 2 CRISPR-Cas systems. *Nat Rev Microbiol*
- 403 51. Marchler-Bauer A, *et al.* (2015) CDD: NCBI's conserved domain database. *Nucleic Acids Res* 43(Database issue):D222-226
- 404 52. Edgar RC (2010) Search and clustering orders of magnitude faster than BLAST. *Bioinformatics* 26(19):2460-2461
- 405 53. Katoh K & Standley DM (2013) MAFFT multiple sequence alignment software version 7: improvements in performance and usability. *Mol*  
406 *Biol Evol* 30(4):772-780

- 407 54. Price MN, Dehal PS, & Arkin AP (2010) FastTree 2--approximately maximum-likelihood trees for large alignments. *PLoS One* 5(3):e9490  
408 55. Soding J (2005) Protein homology detection by HMM-HMM comparison. *Bioinformatics* 21(7):951-960  
409 56. Edgar RC (2004) MUSCLE: multiple sequence alignment with high accuracy and high throughput. *Nucleic Acids Res* 32(5):1792-1797  
410 57. Yutin N, Makarova KS, Mekhedov SL, Wolf YI, & Koonin EV (2008) The deep archaeal roots of eukaryotes. *Mol Biol Evol* 25(8):1619-1630  
411 58. Drozdetskiy A, Cole C, Procter J, & Barton GJ (2015) JPred4: a protein secondary structure prediction server. *Nucleic Acids Res*  
412 43(W1):W389-394  
413 59. Krogh A, Larsson B, von Heijne G, & Sonnhammer EL (2001) Predicting transmembrane protein topology with a hidden Markov model:  
414 application to complete genomes. *J Mol Biol* 305(3):567-580

415

416

417

## 418    **Figures**

419

### 420    **Figure 1. The computational pipeline for the analysis of the CRISPR-linked gene space.**

421

### 422    **Figure 2. Protein clusters in CRISPR gene neighborhoods**

423    A. Distribution of voxels in the CRISPRicity-abundance-distance space. Red circles: probability mass distribution for the union of *cas*  
 424    and previously identified CRISPR-associated genes, voxels with CRISPR-index  $I > 2$ ; blue crosses: probability mass distribution for  
 425    the union of *cas* and previously identified CRISPR-associated genes, voxels with CRISPR-index  $I < 2$ ; green diamonds: probability  
 426    mass distribution for unknown genes, voxels with CRISPR-index  $I > 2$  (candidate CRISPR-linked genes); purple crosses: probability  
 427    mass distribution for unknown genes, voxels with CRISPR-index  $I < 2$ .

428    B. Breakdown of previously undetected CRISPR-linked protein clusters by the CRISPR-Cas types and subtypes.

429

### 430    **Figure 3. Locus organization of type III CRISPR-Cas systems containing predicted CRISPR-linked genes encoding membrane** 431    **proteins**

432    A. CorA, divalent cation membrane channel encoded in type III-B CRISPR-ca loci along with two distinct nucleases

433    B. Membrane-associated CARF domain-containing proteins

434    C. Uncharacterized membrane protein family in diverse type III loci

For each locus, species name, genome accession number and the respective nucleotide coordinates and CRISPR-Cas system subtype are indicated. The genes in a representative locus are shown by block arrows which show the transcription direction. The scale of an arrow is roughly proportional to the respective gene length. Homologous genes and domains are color-coded, empty arrows show predicted genes without detectable homologs. On the right, models of the membrane topology of the predicted CRISPR-linked membrane proteins are shown according to the TMHMM predictions. Hypothetical interactions of the identified CRISPR-linked proteins with CRISPR-Cas system components are also depicted (see text). The *cas* gene names follow the current nomenclature (11); for several core *cas* genes, an extension specifies the gene group (gr5, gr6, gr7, groups 5, and 7 of the RAMP superfamily, respectively; gr8, large subunit of the effector complex; gr11, small subunit of the effector complex). Abbreviations and other gene names: RT, reverse transcriptase; DHH, DHH family nuclease; NYN, NYN family nuclease; Lon, Lon family protease; CARF, CRISPR-associated Rossmann fold domain; TM, transmembrane helix; COG5421, transposase of COG5421 family.

#### **Figure 4. Locus organization of type I-E and type IV CRISPR-Cas systems containing predicted CRISPR-linked genes**

##### **A. STAND family NTPases encoded in minimal type I-E loci**

The clade of STAND NTPases associated with type I-E systems is shown on the right (complete tree is available at [ftp://ftp.ncbi.nlm.nih.gov/pub/wolf/\\_suppl/CRISPRicity](ftp://ftp.ncbi.nlm.nih.gov/pub/wolf/_suppl/CRISPRicity)). Genomes in which the STAND NTPases gene is linked to a type I-E locus are shown in blue, and genomes in which there is no such link are shown in black. Colored branches denote three subfamilies (clusters) identified in this work. Support values greater than 70% are indicated for the respective branches.

##### **B. CysH family PAPS reductases encoded in type IV-B loci**

The clade of CysH family enzymes associated with type IV CRISPR-Cas systems is shown on the right (complete tree is available at [ftp://ftp.ncbi.nlm.nih.gov/pub/wolf/\\_suppl/CRISPRicity](ftp://ftp.ncbi.nlm.nih.gov/pub/wolf/_suppl/CRISPRicity)). Genomes in which *cysH*-like genes are linked to type IV-B loci are shown

455 in blue, and genomes in which there is no such link are shown in black. Colored branches denote three subfamilies (clusters) identified  
456 in this work. Support values greater than 70% are indicated for respective branches.

457 The designations are as in Figure 3. CRISPR-arrays are shown by gray block arrows.

458 Additional abbreviations and gene names: ADP-PRT, ADP phosphoribosyltransferase; LRP, LRP family transcriptional regulator;  
459 NB\_ARC, STAND NTPase fused to TPR-repeats (distinct from the predicted CRISPR-linked STAND NTPase); HTH, helix-turn-  
460 helix DNA-binding domain; FlhG, MinD-like ATPase involved in chromosome partitioning or flagellar assembly; SSB, single-  
461 stranded DNA-binding protein; N6-MTase, N6 adenosine methylase.

462

# 463 **Figure 5. Coevolution of predicted CRISPR-linked genes with signature *cas* genes.**

464 The panels show plots of pairwise distances between predicted CRISPR-linked gene products (CorA, membrane-associated CARF-  
465 domain proteins and RT), Cas10 and 16S rRNA estimated from the respective phylogenetic trees. The Spearman rank correlation  
466 coefficient is indicated on each plot.

467



468

469 **SUPPORTING INFORMATION**

470

471 **Table S1. Analysis of candidate CRISPR-linked protein clusters**

472

473 **SUPPORTING INFORMATION FILES (available via ftp)**

474

475 **Additional Information File 1. Genome neighborhoods of all baits (CRISPR arrays, effector genes and adaptation genes)**

476 Islands.tar.gz at [ftp://ftp.ncbi.nlm.nih.gov/pub/wolf/\\_suppl/CRISPRicity](ftp://ftp.ncbi.nlm.nih.gov/pub/wolf/_suppl/CRISPRicity)

477

478 **Additional Information File 2. Multiple sequence alignments (profiles) for CRISPR-Cas accessory genes**

479 NewProfiles.tar.gz at [ftp://ftp.ncbi.nlm.nih.gov/pub/wolf/\\_suppl/CRISPRicity](ftp://ftp.ncbi.nlm.nih.gov/pub/wolf/_suppl/CRISPRicity)

480

481 **Additional Information File 3. List of sequence alignments (profiles) for CRISPR-Cas accessory genes**

482 icity-profiles.xlsx at [ftp://ftp.ncbi.nlm.nih.gov/pub/wolf/\\_suppl/CRISPRicity](ftp://ftp.ncbi.nlm.nih.gov/pub/wolf/_suppl/CRISPRicity)

483

484 **Additional Information File 4. Phylogenetic analysis of STAND NTPase family**

485 STAND.tar.gz at [ftp://ftp.ncbi.nlm.nih.gov/pub/wolf/\\_suppl/CRISPRicity](ftp://ftp.ncbi.nlm.nih.gov/pub/wolf/_suppl/CRISPRicity) (tree in Newick format, sequences in FASTA format)

486

487 **Additional Information File 5. Phylogenetic analysis of CysH family**

488 CysH.tar.gz at [ftp://ftp.ncbi.nlm.nih.gov/pub/wolf/\\_suppl/CRISPRicity](ftp://ftp.ncbi.nlm.nih.gov/pub/wolf/_suppl/CRISPRicity) (tree in Newick format, sequences in FASTA format)

489

490 **Additional Information File 6. Phylogenetic analysis of CRISPR-Cas associated RTs**

491 RT.tar.gz at [ftp://ftp.ncbi.nlm.nih.gov/pub/wolf/\\_suppl/CRISPRicity](ftp://ftp.ncbi.nlm.nih.gov/pub/wolf/_suppl/CRISPRicity) (tree in Newick format, sequences in FASTA format)

492

493 **Additional Information File 7. Phylogenetic analysis of CARF family**

494 CARF.tar.gz at [ftp://ftp.ncbi.nlm.nih.gov/pub/wolf/\\_suppl/CRISPRicity](ftp://ftp.ncbi.nlm.nih.gov/pub/wolf/_suppl/CRISPRicity) (tree in Newick format, sequences in FASTA format)

495

496 **Additional Information File 8. Phylogenetic analysis of CorA family**

497 CorA.tar.gz at [ftp://ftp.ncbi.nlm.nih.gov/pub/wolf/\\_suppl/CRISPRicity](ftp://ftp.ncbi.nlm.nih.gov/pub/wolf/_suppl/CRISPRicity) (tree in Newick format, sequences in FASTA format)

498

499    **Additional Information File 9. Phylogenetic analysis of Cas10 family**

500    Cas10.tar.gz at [ftp://ftp.ncbi.nlm.nih.gov/pub/wolf/\\_suppl/CRISPRicity](ftp://ftp.ncbi.nlm.nih.gov/pub/wolf/_suppl/CRISPRicity) (tree in Newick format, sequences in FASTA format)

501

502    **Additional Information File 10. Phylogenetic analysis of 16S rRNA**

503    16sRRNA.tar.gz at [ftp://ftp.ncbi.nlm.nih.gov/pub/wolf/\\_suppl/CRISPRicity](ftp://ftp.ncbi.nlm.nih.gov/pub/wolf/_suppl/CRISPRicity) (tree in Newick format, sequences in FASTA format)

504

# CRISPRicity pipeline

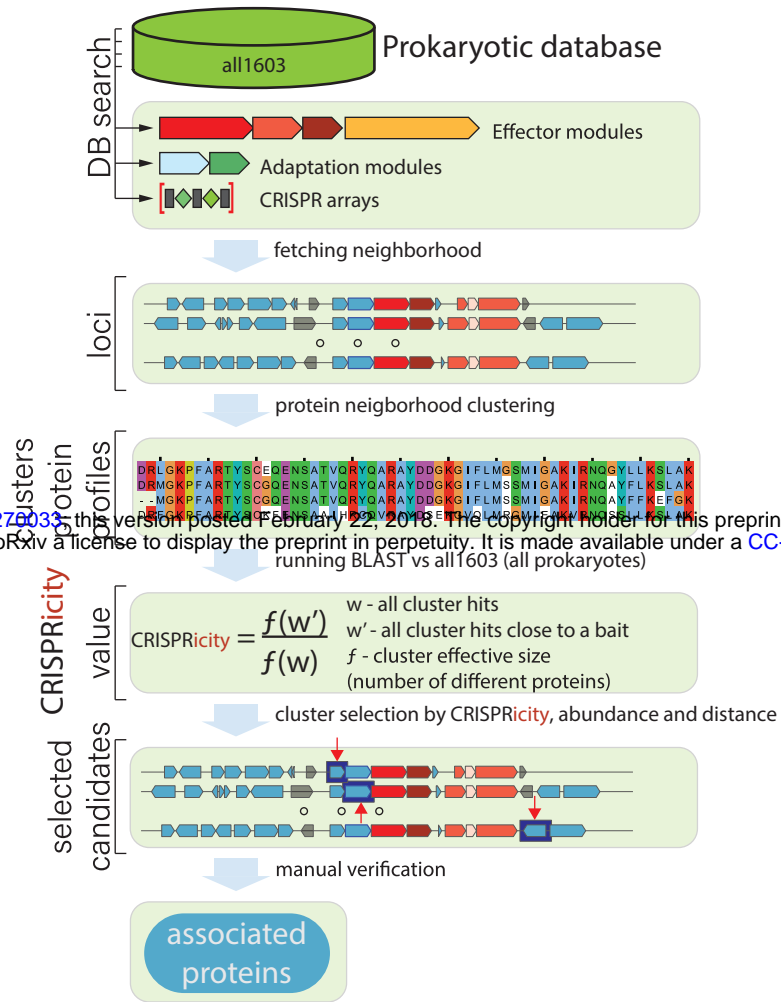

**A**

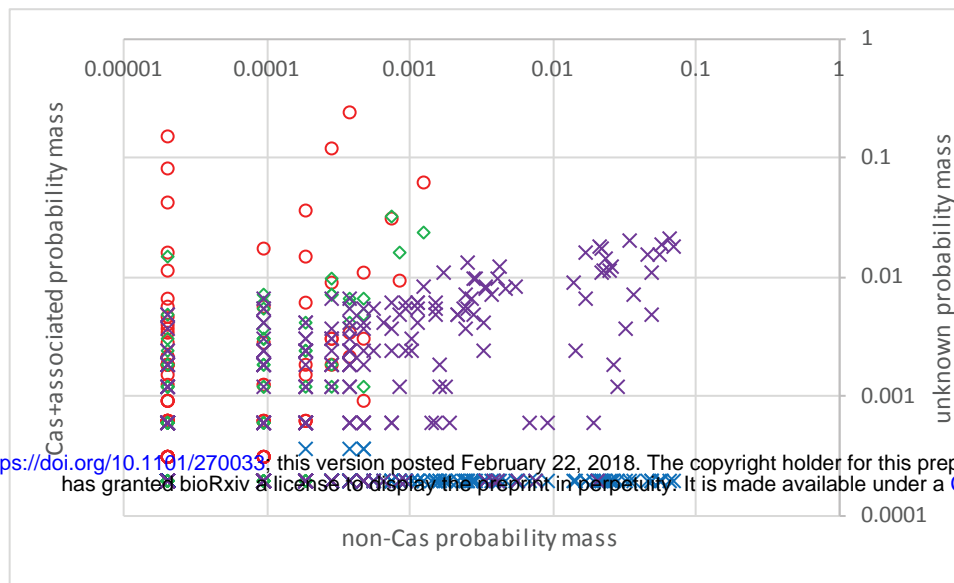

**B**

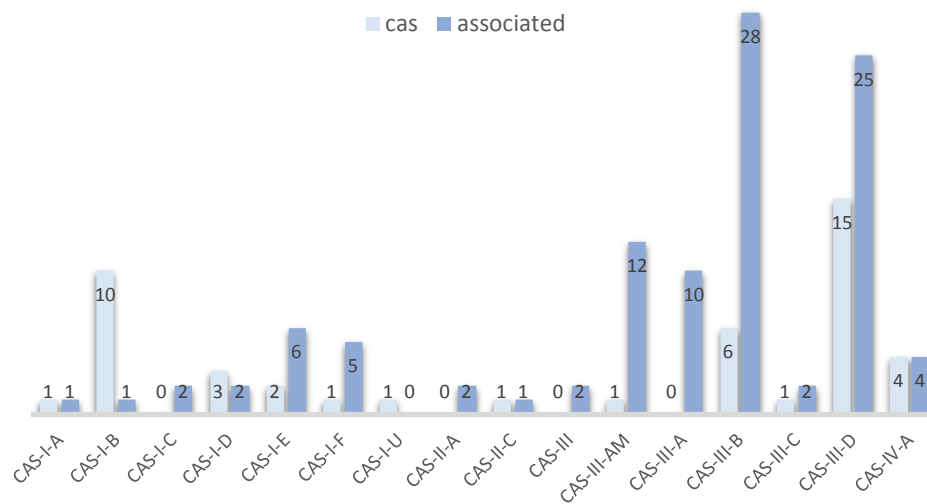

A

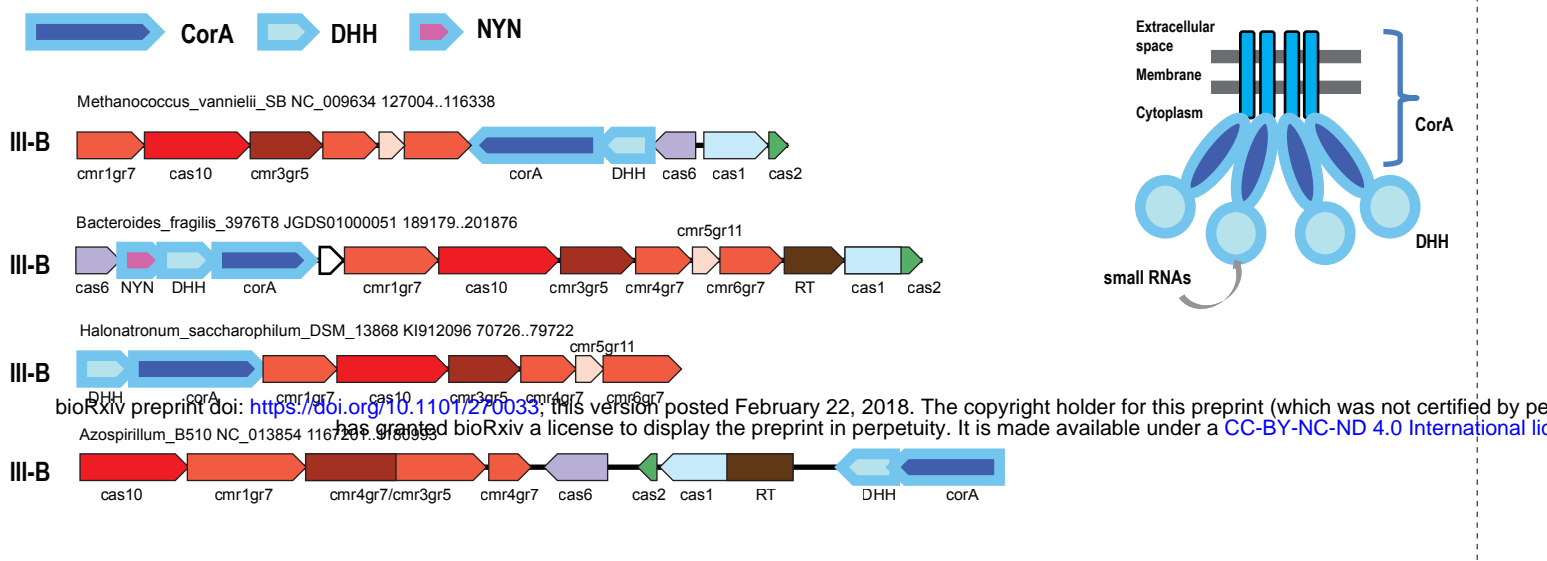

B

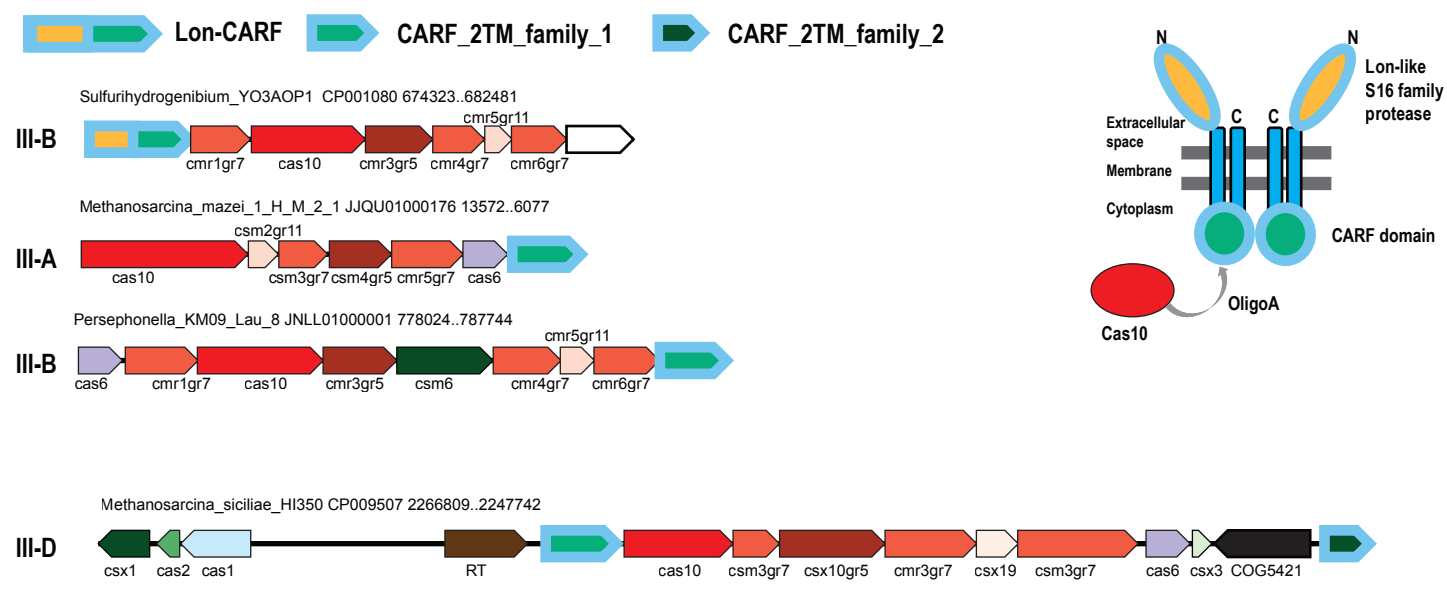

C

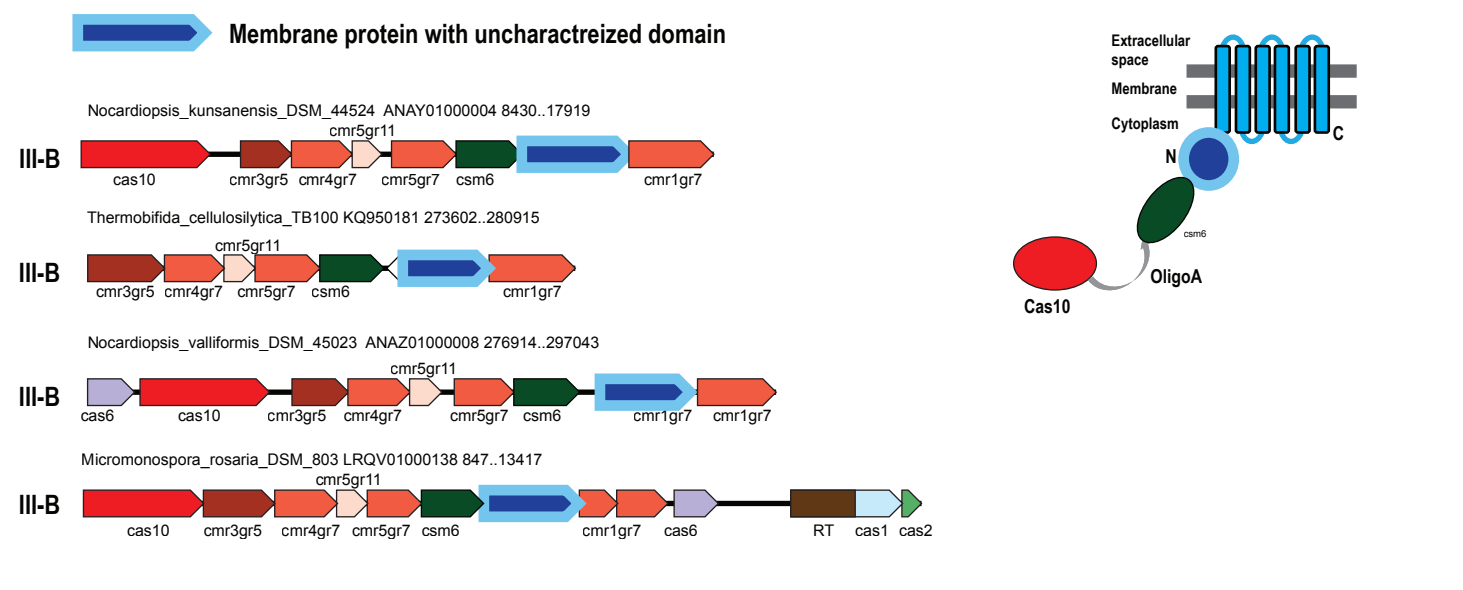

A

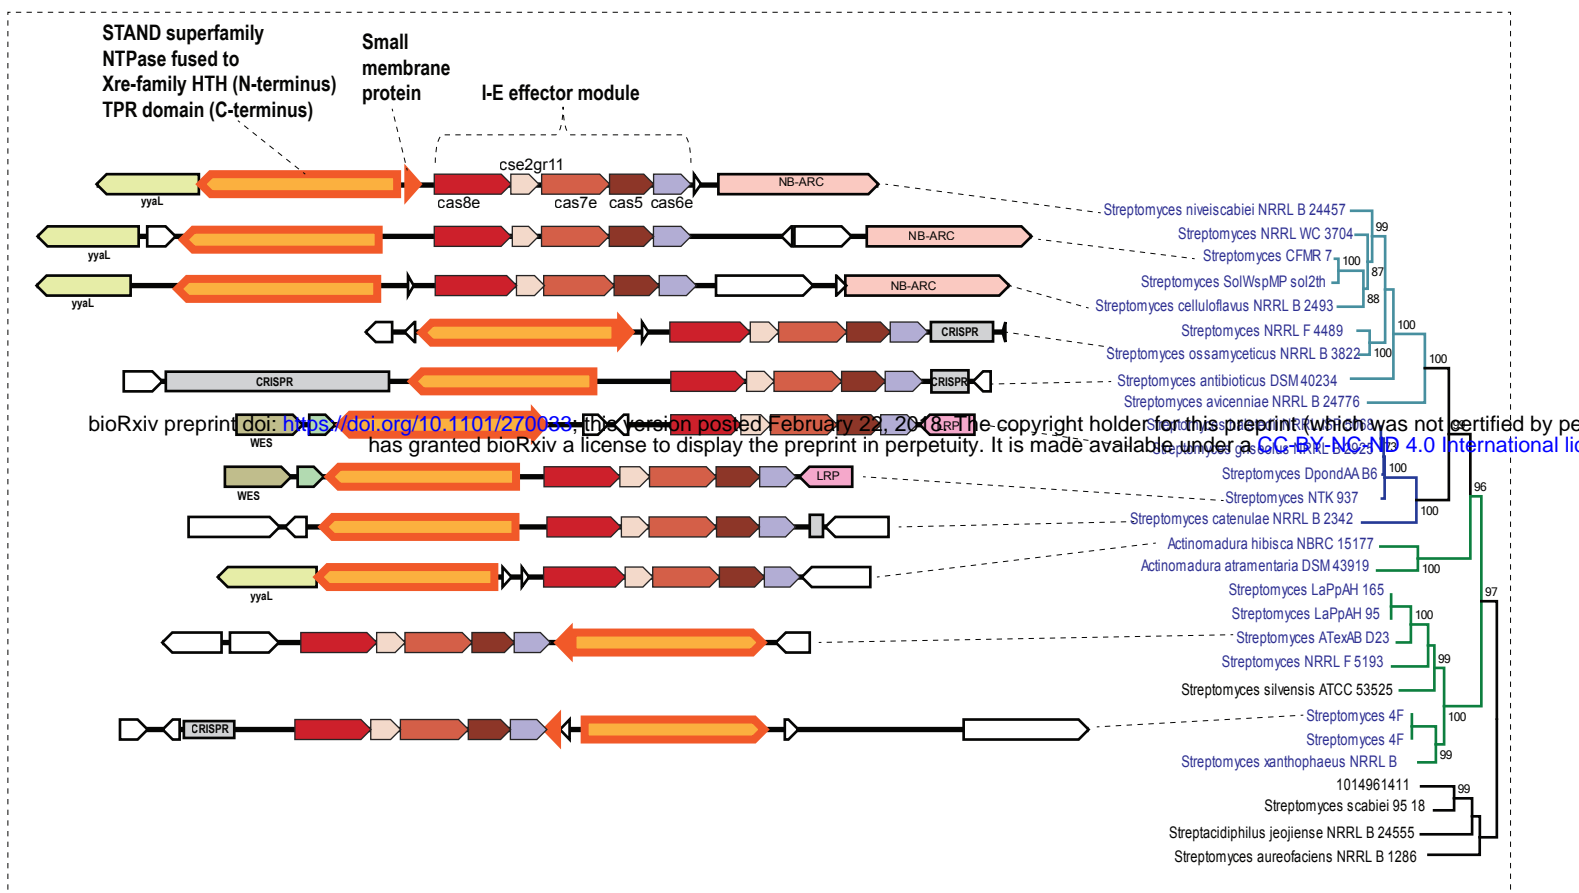

B

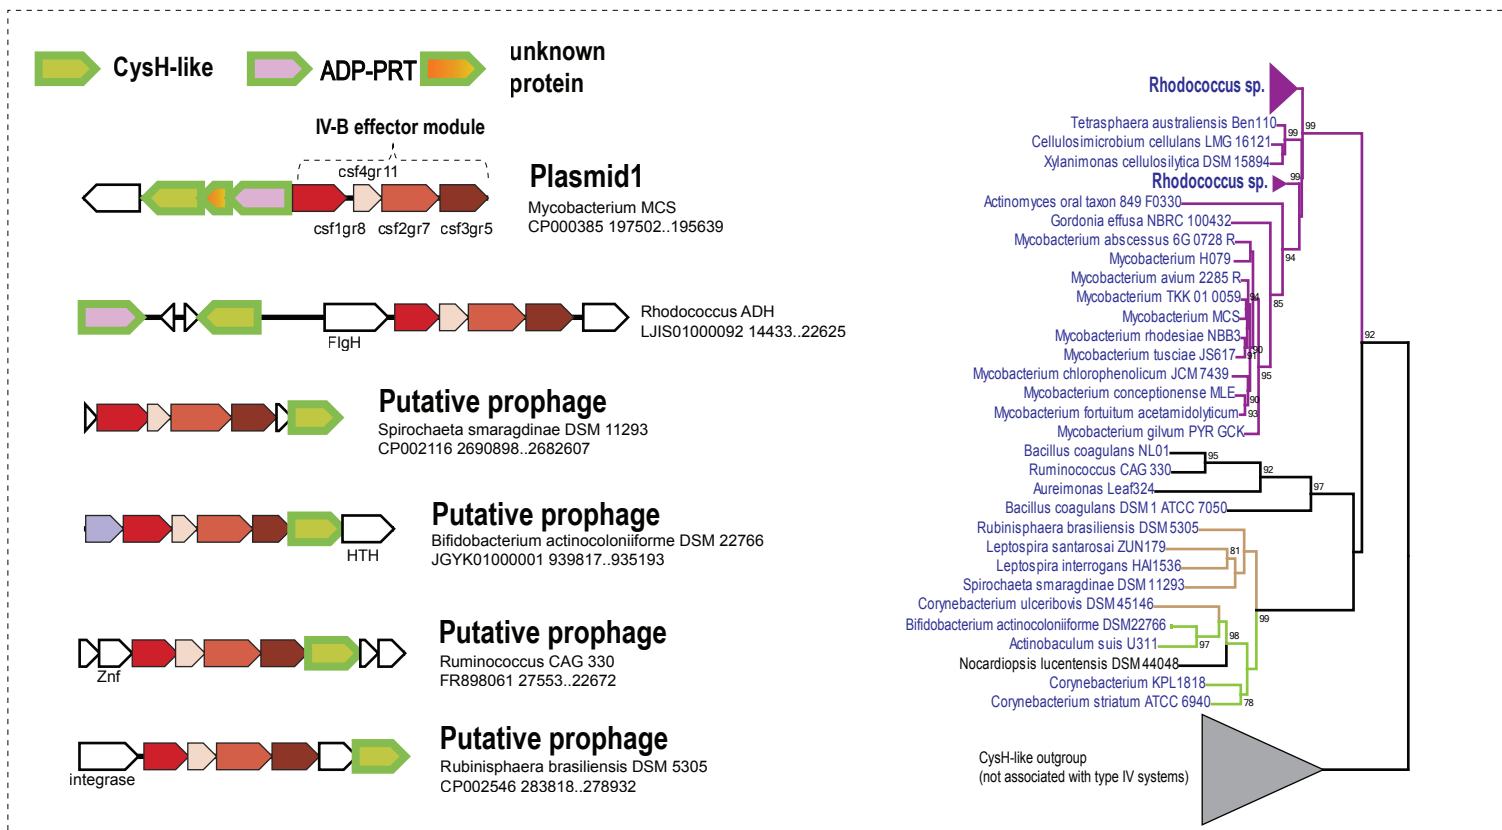



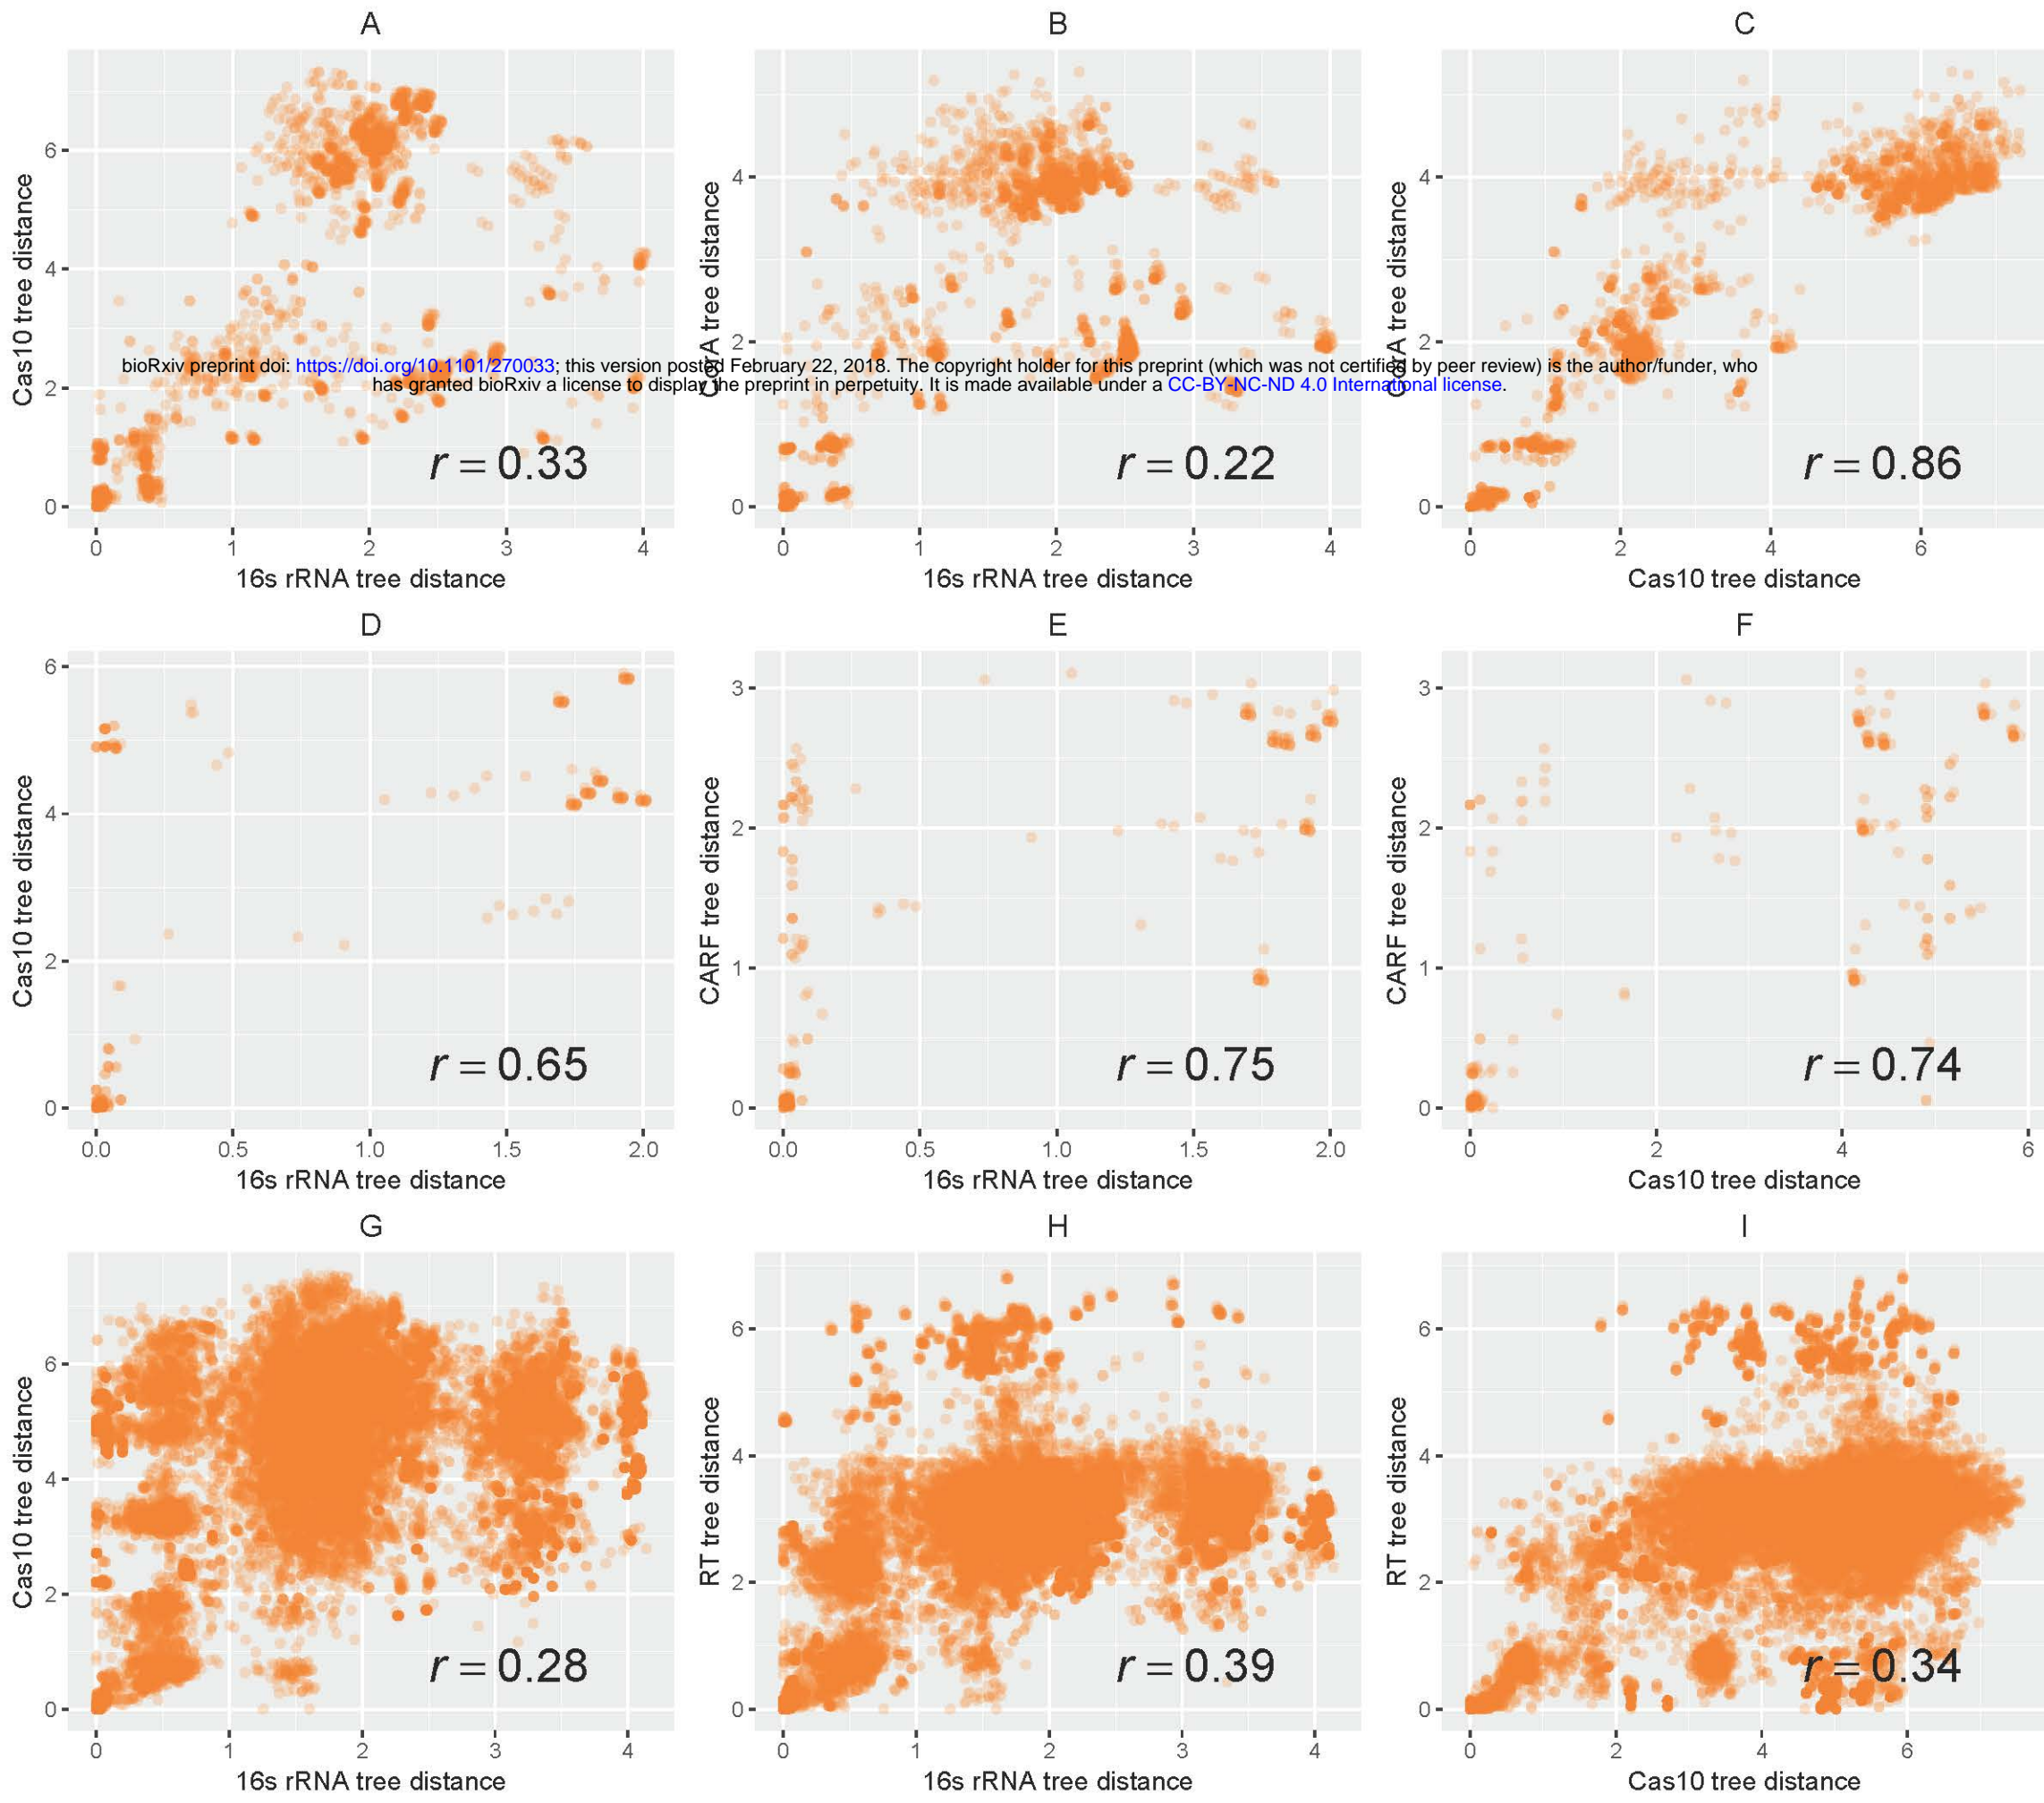

Source: https://www.biorxiv.org/content/10.1101/270033v1.full.pdf
